# Supplementary material
Source: ML conference proceedings conference paper supplement (https://openreview.net/forum?id=9hmDl8fFDs)
Supplement: supplementary_material [file attachment]

Table 1: In the following table, we present sample images, their corresponding complex channels obtained using our R2C transform, the reconstructed images from our inverse R2C transform, and the SSIM comparison scores between the original and reconstructed images.

| Original Image                                                                      | Complex Intensity<br>$\Re(I_\theta)$ $\Im(I_\theta)$                                |                                                                                     | Complex Hue<br>$\Re(I_\phi)$ $\Im(I_\phi)$                                          |                                                                                      | Reconstructed Image                                                                   | SSIM |
|-------------------------------------------------------------------------------------|-------------------------------------------------------------------------------------|-------------------------------------------------------------------------------------|-------------------------------------------------------------------------------------|--------------------------------------------------------------------------------------|---------------------------------------------------------------------------------------|------|
|    |    |    |    |    |    | 1.0  |
|    |    |    |    |    |    | 1.0  |
|   |   |   |   |   |   | 1.0  |
|  |  |  |  |  |  | 1.0  |
|  |  |  |  |  |  | 1.0  |
|  |  |  |  |  |  | 1.0  |
|  |  |  |  |  |  | 1.0  |
